# Supplementary material
Source: HighWire-hosted journal article supplement (https://jnm.snmjournals.org/highwire/filestream/94740/field_highwire_adjunct_files/0/155929_Supplemental_Data.pdf)
Supplement: 155929_Supplemental_Data.pdf [file 155929_Supplemental_Data.pdf]

## SUPPLEMENTAL MATERIALS AND METHODS

### Synthesis of compound **YC-36**:

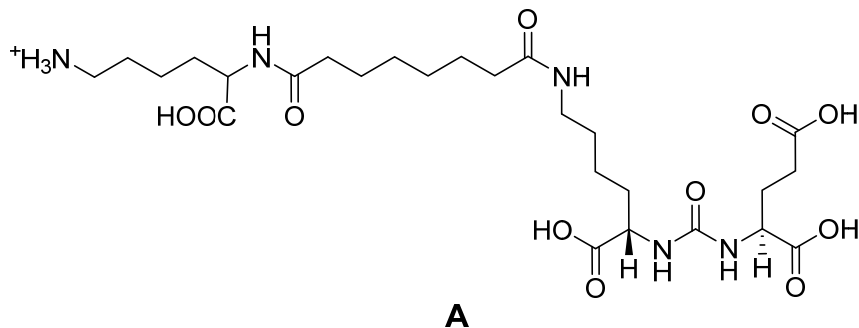

To a solution of compound **A**<sup>1</sup> (1.5 mg, 2.10  $\mu$ mol) in dimethylformamide (1 mL) was added triethylamine (0.005 mL, 35.9  $\mu$ mol), followed by fluorescein isothiocyanate isomer 1 (1 mg, 2.57  $\mu$ mol). After 2 hour at room temperature, the reaction mixture was purified by high performance liquid chromatography (column, Econosphere C18 5 $\mu$ , 150  $\times$  4.6 mm; retention time, 15 min; mobile phase, H<sub>2</sub>O/CH<sub>3</sub>CN/TFA = 75/25/0.1; flow rate, 1 mL/min) to afford 1.5 mg (72%) of compound **YC-36**. ESI-Mass calcd for C<sub>47</sub>H<sub>57</sub>N<sub>6</sub>O<sub>16</sub>S [M+H]<sup>+</sup> 993.4, found 992.8.

### Fluorescence-Activated Cell Sorting:

PC3 PIP and PC3 flu cells were prepared in RPMI supplemented with 1% FBS at 1 million cells per mL density. Cells were stained with 100nM YC-36 for 1 h at room temperature and washed twice with the same media. Cells were analyzed using the FACSCalibur (BD Biosciences) and FlowJo software (FLOWJO, LLC).

### SPECT/CT Imaging (single photon emission computed tomography):

At 24 h post injection, the mice were anesthetized with isoflurane and maintained under 1% isoflurane in oxygen. The mice were positioned on the X-SPECT (Gamma Medica) gantry and scanned using two low energy, high-resolution pinhole collimators. All gamma images were reconstructed using LumaGEMsoftware (GammaMedica). Immediately following SPECT acquisition, the mice were then scanned by CT (X-SPECT) over a 4.6 cm field-of-view using a 600  $\mu$ A, 50 kV beam. The SPECT and CT data were then coregistered using the supplier's software (Gamma Medica) and displayed as maximum intensity projection image.

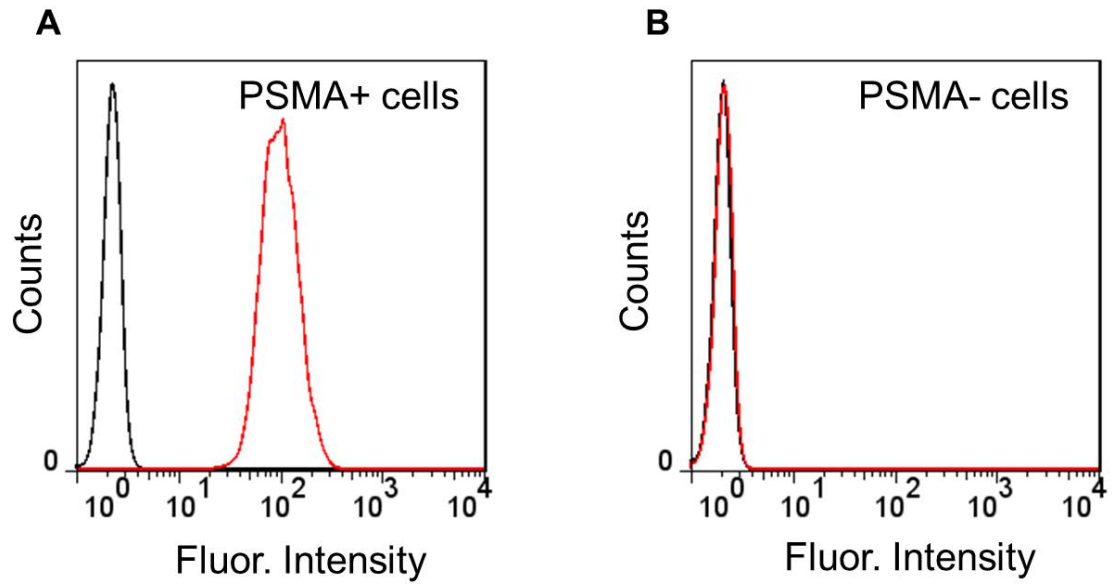

**Supplemental Figure 1.** Fluorescence-activated cell sorting of live cells of PSMA+ PC3 PIP (A) and PSMA- PC3 flu (B) after staining with 100nM of YC-36. Black line indicates non-stained cells, and red line indicates cells stained with YC-36.

**A**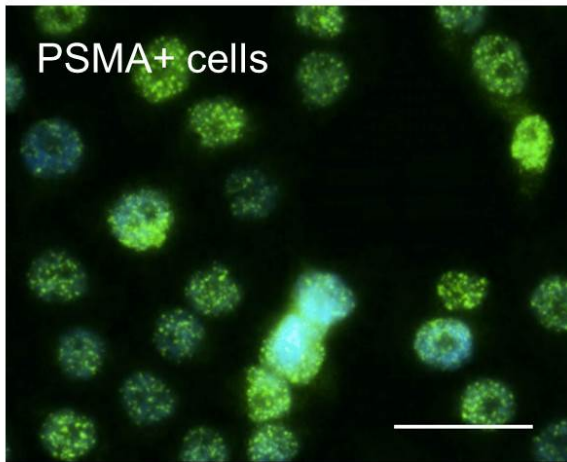**B**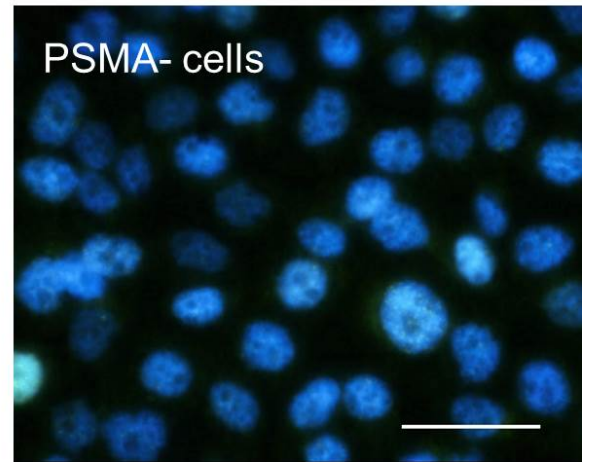

**Supplemental Figure 2.** Images of  $\gamma$ H2AX staining (green) in PSMA+ PC3 PIP (A) and PSMA- PC3 flu (B) cells after treatment for 18 hours with 10  $\mu$ Ci/ml  $^{125}$ I-DCIBzL. Hoechst dye (blue) stains all DNA. Scale bars indicate 50  $\mu$ m. Quantification of  $\gamma$ H2AX foci per cell is shown in Figure 3B.

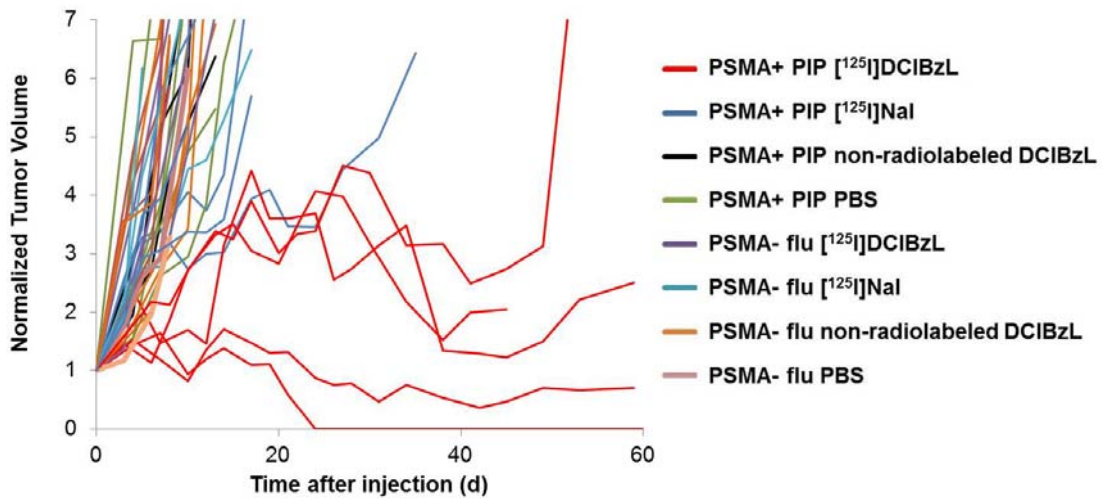

**Supplemental Figure 3.** Tumor growth delay in nude mice bearing PSMA+ PC3 PIP or PSMA- PC3 flu flank xenografts after treatment with 3 mCi (111 MBq)  $^{125}\text{I}$ -DCIBzL or equal amount of control compounds ( $n = 5$  mice per group;  $p = 0.002$  by log rank test). This plot shows the normalized tumor size of individual animals, and the corresponding Kaplan-Meier plot is shown in Figure 5A. Please note that one animal treated with  $^{125}\text{I}$ -DCIBzL died at 45 days after treatment due to unrelated infection with no prior weight loss or evidence of metastatic spread.

## REFERENCES

1. Chen, Y.; Dhara, S.; Banerjee, S. R.; Byun, Y.; Pullambhatla, M.; Mease, R. C.; Pomper, M. G., A low molecular weight PSMA-based fluorescent imaging agent for cancer. *Biochem Biophys Res Commun* **2009**, *390* (3), 624-9.
